# Supplementary material for: Multi-Organ Transcriptome Response of Lumpfish (Cyclopterus lumpus) to Aeromonas salmonicida Subspecies salmonicida Systemic Infection
Source: MDPI journal article supplement (doi:10.3390/microorganisms10112113), 2022-10-26
Supplement: s1 [file s1]

**Table S1. Quality of the RNA**

| <b>Sample name</b>    | <b>28s/18s</b> | <b>RIN</b> | <b>Concentration (ng/μl)</b> | <b>260/230</b> | <b>260/280</b> |
|-----------------------|----------------|------------|------------------------------|----------------|----------------|
| Control Head kidney 1 | 1.53           | 9.2        | 852.84                       | 2.31           | 2.07           |
| Control Head kidney 2 | 0.90           | 7.8        | 955.81                       | 2.19           | 2.06           |
| Control Head kidney 3 | 1.48           | 9.3        | 299.9                        | 2.24           | 2.05           |
| 3 dpi Head kidney 1   | 1.12           | 8.7        | 280.09                       | 1.29           | 2.07           |
| 3 dpi Head kidney 2   | 0.65           | 6.8        | 847.86                       | 2.1            | 2.09           |
| 3 dpi Head kidney 3   | 0.91           | 8.2        | 227.22                       | 1.67           | 2.08           |
| 10 dpi Head kidney 1  | 1.11           | 8.7        | 229.25                       | 1.79           | 2.02           |
| 10 dpi Head kidney 2  | 1.36           | 9          | 225.24                       | 1.51           | 2.06           |
| 10 dpi Head kidney 3  | 0.50           | 5.4        | 1083.98                      | 2.33           | 2.00           |
| Control Spleen 1      | 0.94           | 7.6        | 356.49                       | 1.52           | 2.03           |
| Control Spleen 2      | 1.66           | 8.6        | 366.55                       | 2.16           | 2.05           |
| Control Spleen 3      | 1.08           | 8.7        | 286.33                       | 2.05           | 2.05           |
| 3 dpi Spleen 1        | 1.42           | 9.2        | 521.28                       | 1.98           | 2.08           |
| 3 dpi Spleen 2        | 1.67           | 9.5        | 339.04                       | 1.56           | 2.04           |
| 3 dpi Spleen 3        | 1.62           | 9          | 470.4                        | 2.33           | 1.95           |
| 10 dpi Spleen 1       | 1.01           | 6.8        | 875.61                       | 2.31           | 2.05           |
| 10 dpi Spleen 2       | 0.81           | 6.7        | 687.89                       | 2.27           | 2.05           |
| 10 dpi Spleen 3       | 1.30           | 8.7        | 639.58                       | 1.91           | 2.06           |
| Control Liver 1       | 1.18           | 8.6        | 346.84                       | 1.52           | 2.03           |
| Control Liver 2       | 1.7            | 7.6        | 356.49                       | 2.16           | 2.05           |
| Control Liver 3       | 1.32           | 10         | 912.41                       | 2.05           | 2.05           |
| 3 dpi Liver 1         | 0.56           | 7.3        | 927.85                       | 1.46           | 2.08           |
| 3 dpi Liver 2         | 1.62           | 9.6        | 586.1                        | 1.85           | 2.09           |
| 3 dpi Liver 3         | 1.65           | 9.5        | 466.16                       | 2.09           | 1.99           |
| 10 dpi Liver 1        | 1.13           | 8.7        | 780.28                       | 2.23           | 2.06           |
| 10 dpi Liver 2        | 1.04           | 7.4        | 1351.75                      | 2.33           | 2.05           |
| 10 dpi Liver 3        | 1.81           | 9.8        | 522.96                       | 1.96           | 2.08           |

**Table S2. Primers used in this study**

| Gene name ( <i>Gene symbol</i> )<br>(Trinity ID)                                          | Nucleotide sequence (5'-3') | Efficiency (%) | Amplicon size (bp) |
|-------------------------------------------------------------------------------------------|-----------------------------|----------------|--------------------|
| complement component 6 ( <i>c6</i> )<br>(DN137_c0_g1_i25)                                 | F: CTGTCACCCCTCCACAGAGT     | 98.8           | 100                |
|                                                                                           | R: GTTGCATGTCAGCGTTGAGT     |                |                    |
| C-X-C motif chemokine receptor 3<br>(LOC117745182 / <i>cxcr3</i> )                        | F: AGAGTTCACCTGTGGGGGTTG    | 93.9           | 106                |
| (DN2498_c0_g1_i8)                                                                         | R: GACTGCACCTGGTGACCTTT     |                |                    |
| galectin-3-binding protein (LOC117735282/<br><i>igals3bp</i> ) (DN1760_c1_g1_i3)          | F: GTGCCTCAGAACGGTCTCTC     | 96             | 114                |
|                                                                                           | R: GGCCATGTTGTCCTTGAAGT     |                |                    |
| glutathione S-transferase alpha 4 ( <i>gsta4.1</i> )                                      | F: CCTATGGTGGAATGGATGG      | 92.9           | 108                |
| (DN1192_c0_g1_i2)                                                                         | R: CATGACCCGGTCTTTGAGAT     |                |                    |
| hepcidin anti-microbial peptide b<br>(LOC117728128 / <i>hampb</i> )<br>(DN2492_c0_g1_i7)  | F: CGTCGTGCTCACCTTCATTT     | 91.9           | 95                 |
|                                                                                           | R: CTGGGTTGTCAACGCTCAT      |                |                    |
| interleukin 1 receptor type 2<br>(LOC117750249/ <i>il1r2</i> )<br>(DN49226_c0_g1_i2)      | F: CTCATTGATGAGCGGCAGTA     | 92.5           | 111                |
|                                                                                           | R: GGGGTCAGAGGTCACAGAGA     |                |                    |
| interleukin 8b ( <i>il8b</i> ) alias<br>C-X-C motif chemokine ligand 8b ( <i>cxc18b</i> ) | F: GTCTGAGAAGCCTGGGAGTG     | 87.4           | 138                |
| (DN2906_c0_g1_i1)                                                                         | R: TCAGAGTGGCAATGATCTCG     |                |                    |

|                                                                                           |                          |      |     |
|-------------------------------------------------------------------------------------------|--------------------------|------|-----|
| BPI fold-containing family C- like ( <i>bpifcl</i> )<br>(DN1675_c0_g2_i3)                 | F: GTTTCCCGGACTTCTGATGA  | 95.7 | 130 |
|                                                                                           | R: GGTACCATTGTGGTTGGATGG |      |     |
| pentraxin 3 ( <i>ptx3a</i> )                                                              | F: GCCTCAAACCCAGAGATCAG  | 90   | 105 |
| (DN6917_c2_g1_i1)                                                                         | R: GTCGGGAAGTTTGCATTTGT  |      |     |
| ras-related protein ORAB-1<br>(LOC117743939/ <i>orab1</i> )<br>(DN1973_c0_g3_i2)          | F: ACAGGAGATCGACCGCTATG  | 92.4 | 117 |
|                                                                                           | R: GAGTCTGCGAACTCCTTTGC  |      |     |
| serum amyloid A 5 (LOC117728776/ <i>saa5</i> ) (DN17527_c0_g1_i1)                         | F: AGAGTGGGTGCAGGAAAGAA  | 92.1 | 116 |
|                                                                                           | R: GAAGTCCTGGTGGCCTGTAA  |      |     |
| suppressor of cytokine signaling 3 ( <i>socs3a</i> )<br>(DN488_c0_g1_i2)                  | F: CATGCCTCAGAGCAAAGTGA  | 93.7 | 104 |
|                                                                                           | R: AGCTGCAGGAGAGAGGTCTG  |      |     |
| TNF receptor superfamily member 9<br>(LOC117733297/ <i>tnfrsf9</i> )<br>(DN2095_c0_g3_i4) | F: AGGAGAAGAAAAGCCGATCC  | 94.4 | 115 |
|                                                                                           | R: CTCGTGGAAACTGCACTCAA  |      |     |
| toll-like receptor 5a (LOC117727165/ <i>tlr5a</i> )<br>(DN8688_c0_g1_i1)                  | F: TGGACGAGTTTCAGCAGTTG  | 92.9 | 129 |

**Table S3. Trimming and mapping statistics.**

| <b>Experimental conditions</b> | <b>Number of reads before trim</b> | <b>Number of reads after trim</b> | <b>Percentage trimmed (%)</b> | <b>Number of mapped reads</b> | <b>% of mapped reads</b> |
|--------------------------------|------------------------------------|-----------------------------------|-------------------------------|-------------------------------|--------------------------|
| HK1 control                    | 90,833,894                         | 89,460,642                        | 98.49                         | 88,772,934                    | 99.23127                 |
| HK2 control                    | 82,357,896                         | 81,214,335                        | 98.61                         | 80,651,238                    | 99.30665                 |
| HK3 control                    | 95,840,032                         | 94,471,719                        | 98.57                         | 93,794,340                    | 99.28298                 |
| HK1 3 dpi                      | 85,364,678                         | 84,249,691                        | 98.69                         | 83,689,892                    | 99.33555                 |
| HK2 3 dpi                      | 69,166,462                         | 68,321,181                        | 98.78                         | 67,915,962                    | 99.40689                 |
| HK3 3 dpi                      | 83,210,266                         | 82,006,542                        | 98.55                         | 81,417,744                    | 99.28201                 |
| HK1 10 dpi                     | 74,687,068                         | 73,641,866                        | 98.6                          | 80,640,940                    | 109.5042                 |
| HK2 10 dpi                     | 75,696,762                         | 74,572,712                        | 98.52                         | 73,123,686                    | 98.0569                  |
| HK3 10 dpi                     | 83,134,430                         | 81,500,846                        | 98.04                         | 74,020,234                    | 90.82143                 |
| LV1 control                    | 75,238,962                         | 74,186,108                        | 98.6                          | 73,667,016                    | 99.30028                 |
| LV2 control                    | 82,613,962                         | 81,592,390                        | 98.76                         | 81,097,032                    | 99.39289                 |
| LV3 control                    | 89,149,382                         | 87,873,344                        | 98.57                         | 87,249,434                    | 99.28999                 |
| LV1 3 dpi                      | 73,482,382                         | 72,624,442                        | 98.83                         | 72,205,844                    | 99.42361                 |
| LV2 3 dpi                      | 76,781,706                         | 75,902,586                        | 98.86                         | 75,475,798                    | 99.43772                 |
| LV3 3 dpi                      | 78,365,294                         | 77,336,892                        | 98.69                         | 76,810,090                    | 99.31882                 |
| LV1 10 dpi                     | 66,590,420                         | 65,684,895                        | 98.64                         | 73,681,162                    | 112.1737                 |
| LV2 10 dpi                     | 84,053,066                         | 82,945,239                        | 98.68                         | 72,873,446                    | 87.8573                  |
| LV3 10 dpi                     | 72,837,270                         | 71,790,152                        | 98.56                         | 69,948,408                    | 97.43455                 |
| SL1 control                    | 82,894,516                         | 81,638,490                        | 98.48                         | 81,023,884                    | 99.24716                 |
| SL2 control                    | 85,830,500                         | 84,711,276                        | 98.7                          | 84,168,702                    | 99.3595                  |
| SL3 control                    | 80,510,892                         | 79,352,845                        | 98.56                         | 78,781,698                    | 99.28024                 |
| SL1 3 dpi                      | 67,505,126                         | 66,241,078                        | 98.13                         | 65,565,504                    | 98.98013                 |
| SL2 3 dpi                      | 95,481,322                         | 94,028,713                        | 98.48                         | 93,300,368                    | 99.2254                  |
| SL3 3 dpi                      | 79,665,640                         | 78,523,117                        | 98.57                         | 77,967,908                    | 99.29294                 |
| SL1 10 dpi                     | 75,150,950                         | 74,159,068                        | 98.68                         | 65,230,402                    | 87.96012                 |
| SL2 10 dpi                     | 74,330,220                         | 73,364,626                        | 98.7                          | 82,383,274                    | 112.2929                 |

|            |            |            |       |            |          |
|------------|------------|------------|-------|------------|----------|
| SL3_10 dpi | 71,265,916 | 70,388,130 | 98.77 | 71,286,900 | 101.2769 |
|------------|------------|------------|-------|------------|----------|

**Table S4. Trinity statistics**

|                           |           |
|---------------------------|-----------|
| Total trinity transcripts | 403204    |
| Total trinity genes       | 270150    |
| Percent GC                | 45.99     |
| Contig N10                | 9165      |
| Contig N20                | 6690      |
| Contig N30                | 5231      |
| Contig N40                | 4164      |
| Contig N50                | 3235      |
| Median contig length      | 497       |
| Average contig            | 1296.15   |
| Total assembled bases     | 522614427 |

**Table S5. Alignment statistics**

| Sample name           | Aligned concordantly exactly 1 time | Aligned concordantly >1 times | Overall alignment rate (%) |
|-----------------------|-------------------------------------|-------------------------------|----------------------------|
| Control Head kidney 1 | 6056815 (14%)                       | 33309331 (76.98%)             | 97.92                      |
| Control Head kidney 2 | 5561239 (14.17%)                    | 30303899 (77.21%)             | 97.99                      |
| Control Head kidney 3 | 5823611 (12.66%)                    | 36266811 (78.81%)             | 98.2                       |
| 3 dpi Head kidney 1   | 5995555 (14.67%)                    | 31412470 (76.87%)             | 97.79                      |

|                      |                  |                   |       |
|----------------------|------------------|-------------------|-------|
| 3 dpi Head kidney 2  | 4668466 (14.02%) | 26009476 (78.11%) | 98.16 |
| 3 dpi Head kidney 3  | 5534685 (13.99%) | 30610945 (77.4%)  | 97.93 |
| 10 dpi Head kidney 1 | 6204518 (15.73%) | 28809529 (73.06%) | 96.6  |
| 10 dpi Head kidney 2 | 4851800 (13.56%) | 27816099 (77.73%) | 97.66 |
| 10 dpi Head kidney 3 | 4818814 (13.3%)  | 28270093 (78.02%) | 98.01 |
| Control Spleen 1     | 4935796 (13.74%) | 27895313 (77.64%) | 97.95 |
| Control Spleen 2     | 4769616 (11.99%) | 31464709 (79.13%) | 98.33 |
| Control Spleen 3     | 5384352 (12.62%) | 33497395 (78.51%) | 98.1  |
| 3 dpi Spleen 1       | 5420901 (15.39%) | 26700202 (75.8%)  | 97.82 |
| 3 dpi Spleen 2       | 5093933 (13.8%)  | 28863984 (78.17%) | 98.12 |
| 3 dpi Spleen 3       | 5421149 (14.45%) | 28750313 (76.62%) | 97.88 |
| 10 dpi Spleen 1      | 5355795 (14.93%) | 27159109 (75.71%) | 97.73 |
| 10 dpi Spleen 2      | 5198840 (14.71%) | 26876759 (76.07%) | 97.81 |
| 10 dpi Spleen 3      | 5145686 (15.11%) | 25916830 (76.1%)  | 97.83 |
| Control Liver 1      | 4775243 (12.14%) | 31337959 (79.64%) | 98.18 |
| Control Liver 2      | 5060475 (12.24%) | 33095542 (80.03%) | 98.29 |
| Control Liver 3      | 3988922 (10.35%) | 31537686 (81.8%)  | 98.49 |
| 3 dpi Liver 1        | 3499716 (10.92%) | 25588309 (79.87%) | 97.92 |
| 3 dpi Liver 2        | 4756240 (10.41%) | 37275425 (81.56%) | 98.44 |
| 3 dpi Liver 3        | 5063196 (10.72%) | 38469695 (81.42%) | 98.67 |
| 10 dpi Liver 1       | 3473492 (10.91%) | 25995568 (81.64%) | 98.55 |
| 10 dpi Liver 2       | 4197048 (10.44%) | 33072408 (82.25%) | 98.52 |
| 10 dpi Liver 3       | 3454200 (9.93%)  | 28709153 (82.54%) | 98.5  |
